# Supplementary figures and images for: Trypanosoma brucei cathepsin-L increases arrhythmogenic sarcoplasmic reticulum-mediated calcium release in rat cardiomyocytes
Source: PubMed Central journal article supplement — Cardiovasc Res. 2013 Jul 26;100(2):325–35. doi: 10.1093/cvr/cvt187 (PMC3797627; doi:10.1093/cvr/cvt187), 2013-07-26

# SUPPLEMENTARY FIGURE 1

□ Control Media    ■ Supernatant    \*  $P < 0.05$

**A**

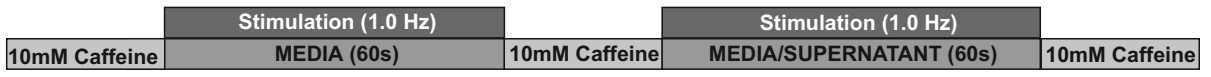

**B**

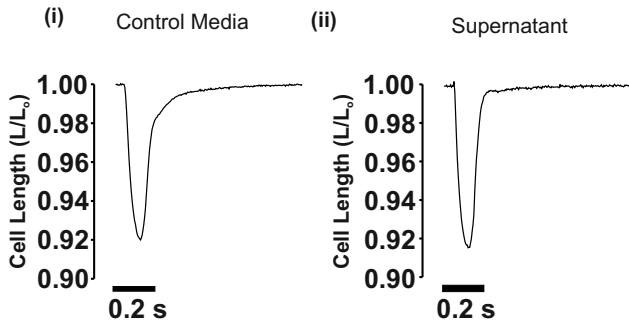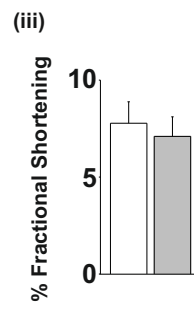

**C**

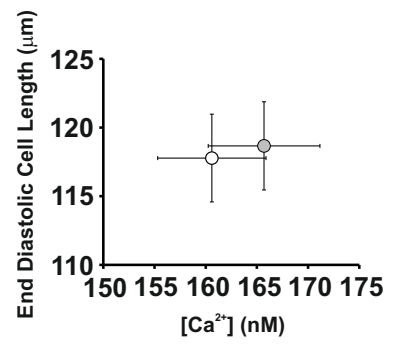

Supplement: supp_cvt187_cvt187supp_fig.pdf [file supp_cvt187_cvt187supp_fig.pdf]
